# Supplementary material for: Phase 2 Randomized Trial of an AS03 Adjuvanted Plant-Based Virus-Like Particle Vaccine for Covid-19 in Healthy Adults, Older Adults and Adults with Comorbidities
Source: bioRxiv or medRxiv preprint supplement (doi:10.1101/2021.05.14.21257248), 2021-10-13
Supplement: Supplementary file [file media-1.pdf]

**SUPPLEMENTARY MATERIAL**

**Supplemental Table 1: Summary of humoral responses in Healthy Adults, Older Adults, and Adults with Comorbidities**

|                            | Healthy Adults         |                 | Older Adults           |                | Adults with Comorbidities |                    |
|----------------------------|------------------------|-----------------|------------------------|----------------|---------------------------|--------------------|
|                            | CoVLP 3.75<br>µg +AS03 | Placebo         | CoVLP 3.75<br>µg +AS03 | Placebo        | CoVLP 3.75<br>µg +AS03    | Placebo            |
| <b>NAb Titer</b>           |                        |                 |                        |                |                           |                    |
| <u>Day 0</u>               |                        |                 |                        |                |                           |                    |
| GMT (95CI)                 | 5.3 (5.1, 5.6)         | 5.0 (NE, NE)    | 5.2 (5.0, 5.5)         | 5.5 (4.6, 6.6) | 8.9 (6.8, 11.6)           | 13.0 (6.4, 26.2)   |
| <u>Day 21</u>              |                        |                 |                        |                |                           |                    |
| GMT (95CI)                 | 44.3 (35.8, 54.8)      | 5.2 (4.8, 5.6)  | 29.7 (23.7, 37.1)      | 5.5 (4.6, 6.5) | 49.1 (31.8, 75.7)         | 20.0 (8.2, 49.0)   |
| <u>Day 42</u>              |                        |                 |                        |                |                           |                    |
| GMT (95CI)                 | 2034 (1754, 2358)      | 5.7 (4.7, 6.8)  | 1918 (1571, 2342)      | 5.6 (4.5, 6.9) | 1962 (1442, 2667)         | 36.2 (12.5, 104.7) |
| <b>Seroconversion Rate</b> |                        |                 |                        |                |                           |                    |
| <u>Day 21</u>              |                        |                 |                        |                |                           |                    |
| SCR, % (95CI)              | 51.3 (44.7, 57.8)      | 0 (0.0, 8.2)    | 38.4 (31.9, 45.1)      | 0 (0.0, 7.9)   | 44.2 (35.1, 53.5)         | 7.7 (0.9, 25.1)    |
| <u>Day 42</u>              |                        |                 |                        |                |                           |                    |
| SCR, % (95CI)              | 99.2 (97.0, 99.9)      | 2.4 (0.1, 12.6) | 97.7 (94.7, 99.2)      | 0 (0.0, 9.0)   | 95.8 (90.4, 98.6)         | 17.4 (5.0, 38.8)   |

NAb: neutralizing antibody, GMT: geometric mean titer, 95CI: 95% confidence interval, SCR: seroconversion rate, NE: not estimable
